# Supplementary material for: Analysis of 3800-year-old Yersinia pestis genomes suggests Bronze Age origin for bubonic plague
Source: Springer Nature journal article supplement (doi:10.1038/s41467-018-04550-9), 2018-06-04
Supplement: 41467_2018_4550_MOESM3_ESM.pdf [file 41467_2018_4550_MOESM3_ESM.pdf]

## **Description of Additional Supplementary Files**

File Name: Supplementary Data 1

Description: SNP table depicting all positions variant in RT5.

File Name: Supplementary Data 2

Description: Table of *Y. pestis* genomes used in this study for phylogenetic analysis

File Name: Supplementary Data 3

Description: *Y. pestis* SNP positions leading to RT5, and their respective alleles in RISE397.

File Name: Supplementary Data 4

Description: *Y. pestis* SNP positions between RT5 and Justinian2148, and their respective alleles in RISE397.
